# Supplementary material for: An integrated self-healing anode assembled via dynamic encapsulation of liquid metal with a 3D Ti3C2Tx network for enhanced lithium storage
Source: Royal Society of Chemistry journal article supplement (doi:10.1039/d2ee02147a), 2022-01-01
Supplement: d2ee02147a3.pdf [file d2ee02147a3.pdf]

## Supporting Information

### **An Integrated Self-healing Anode Assembled via Dynamic Encapsulation of Liquid Metal with 3D Ti<sub>3</sub>C<sub>2</sub>T<sub>x</sub> Network for Enhanced Lithium Storage**

Hanning Zhang<sup>1</sup>, Pengyu Chen<sup>1</sup>, Huan Xia<sup>1</sup>, Gang Xu<sup>1</sup>, Yaping Wang<sup>1</sup>, Tengfei Zhang<sup>2\*</sup>, Wenwen Sun<sup>1</sup>, Muhammadali Turgunov<sup>3</sup>, Wei Zhang<sup>1\*</sup>, ZhengMing Sun<sup>1\*</sup>

<sup>1</sup>Jiangsu Key Laboratory of Advanced Metallic Materials, School of Materials Science and Engineering, Southeast University, Nanjing, 211189, China.

<sup>2</sup> College of Materials Science and Technology, Nanjing University of Aeronautics and Astronautics, Nanjing, 210016, China

<sup>3</sup> Department of Mechanical and Aerospace Engineering, Turin Polytechnic University, Tashkent 100095, Uzbekistan

\*Corresponding authors: w69zhang@seu.edu.cn; zhangtengfei@nuaa.edu.cn; zmsun@seu.edu.cn

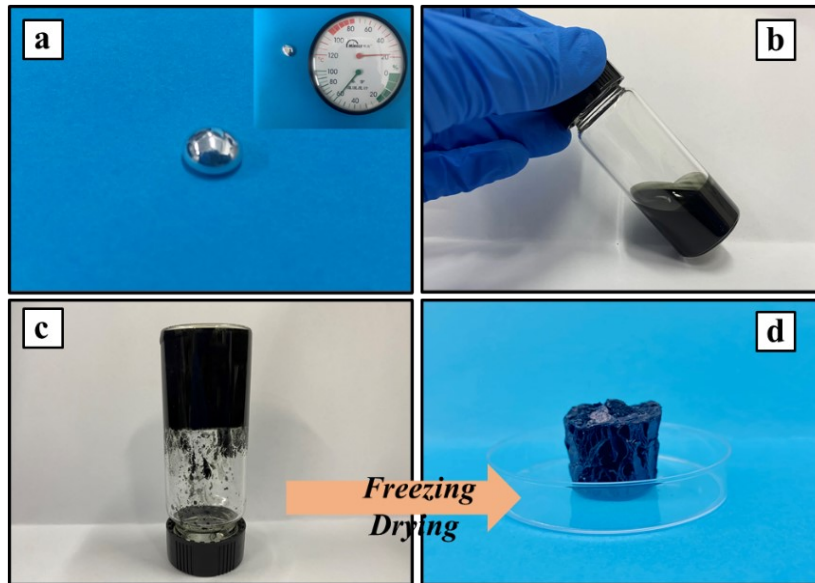

Figure S1 Photo image of colloid suspension of  $\text{Ti}_3\text{C}_2\text{T}_x$  (a), bulk liquid metal (EGaIn-LM) at room temperature (b), LM- $\text{Ti}_3\text{C}_2\text{T}_x$  hydrogel precursor (c) and LM- $\text{Ti}_3\text{C}_2\text{T}_x$  foam (d).

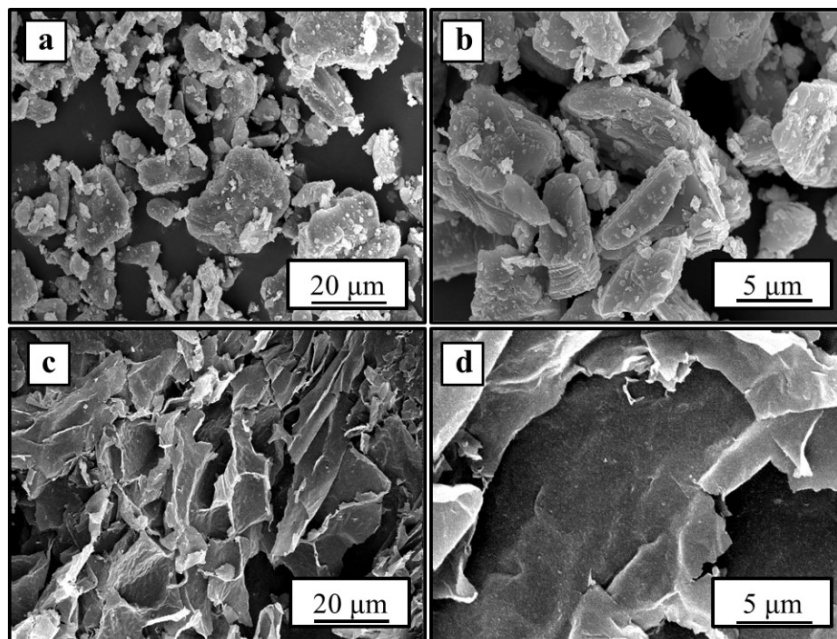

Figure S2 SEM image of  $\text{Ti}_3\text{AlC}_2$  (a, b) and  $\text{Ti}_3\text{C}_2\text{T}_x$  monolith (c, d) with different magnification.

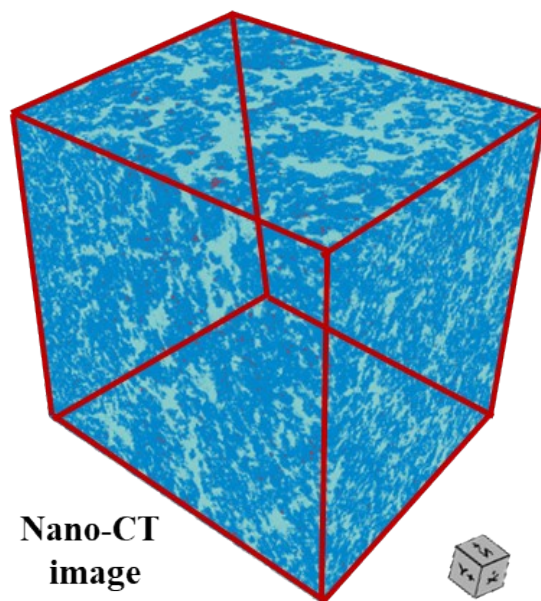

Figure S3 Nano-CT of LM-Ti<sub>3</sub>C<sub>2</sub>T<sub>x</sub>

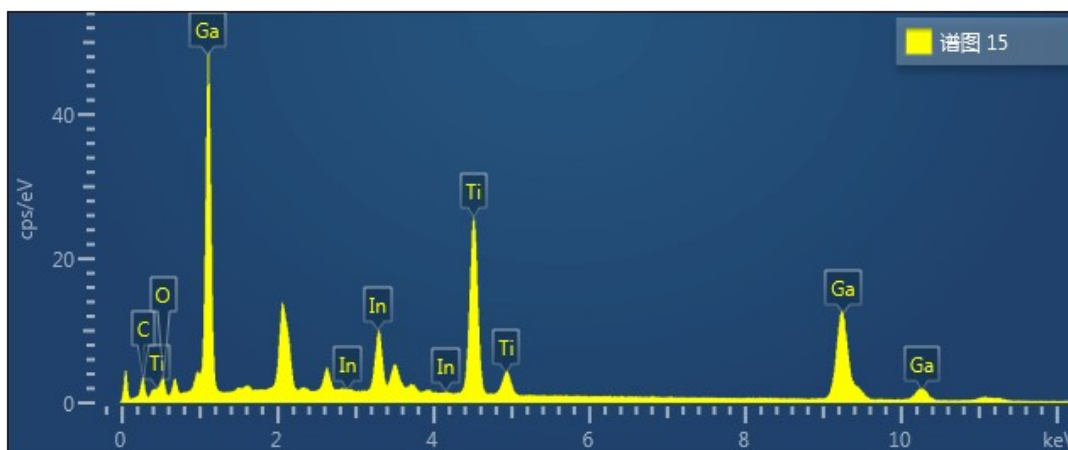

| Element | wt%    | Atom%  |
|---------|--------|--------|
| C       | 10.38  | 34.03  |
| O       | 6.56   | 16.15  |
| Ti      | 20.62  | 16.96  |
| Ga      | 51.59  | 29.14  |
| In      | 10.84  | 3.72   |
| Total:  | 100.00 | 100.00 |

Figure S4 EDX of LM-Ti<sub>3</sub>C<sub>2</sub>T<sub>x</sub>-2:1 and corresponding element ratio.

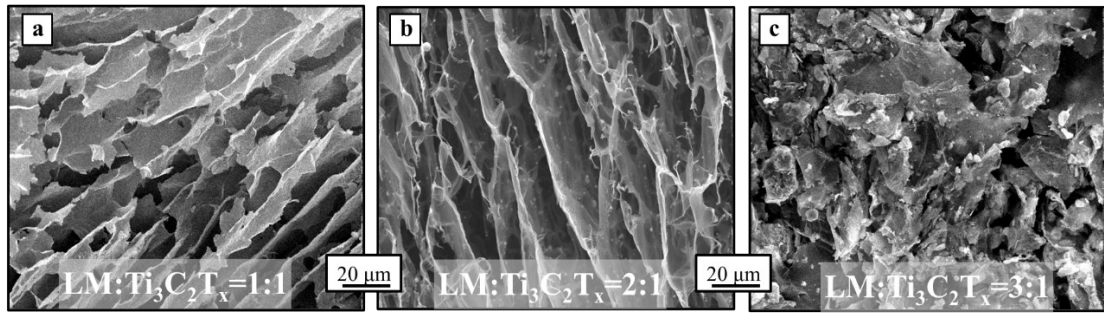

Figure S5 SEM images of LM-Ti<sub>3</sub>C<sub>2</sub>T<sub>x</sub> with different mass ratio.

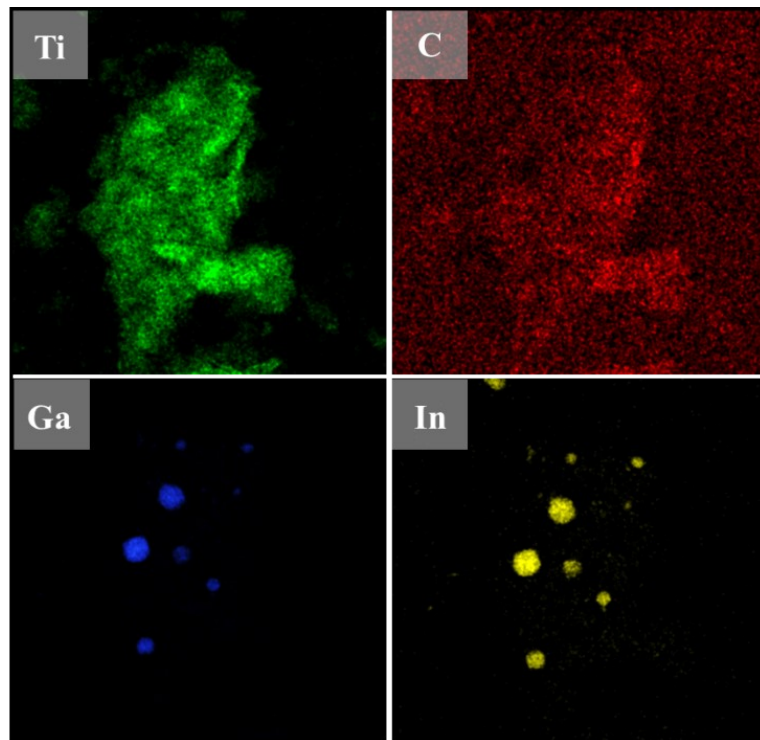

Figure S6 TEM Element distribution of LM-Ti<sub>3</sub>C<sub>2</sub>T<sub>x</sub>

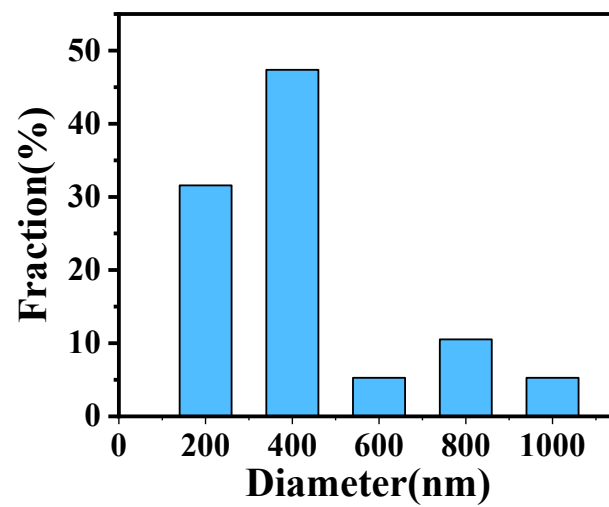

Figure S7 Average size diameter of LM-Ti<sub>3</sub>C<sub>2</sub>T<sub>x</sub>, which is calculated to be 499.7 nm

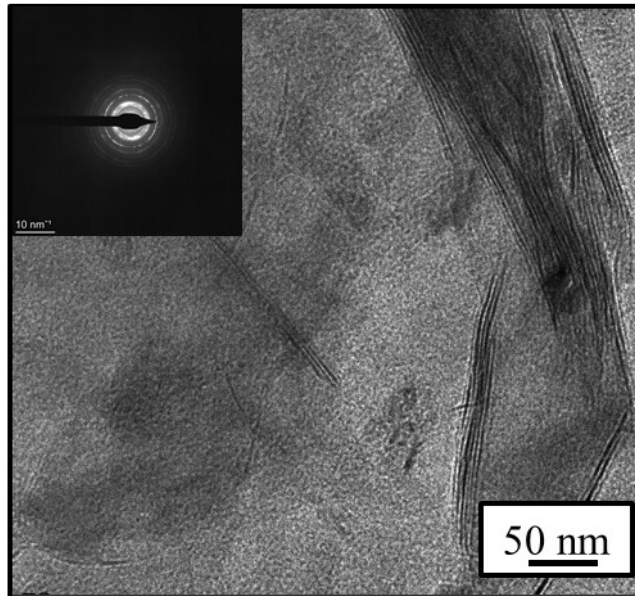

Figure S8 HRTEM and Selected area electron diffraction of LM-Ti<sub>3</sub>C<sub>2</sub>T<sub>x</sub>

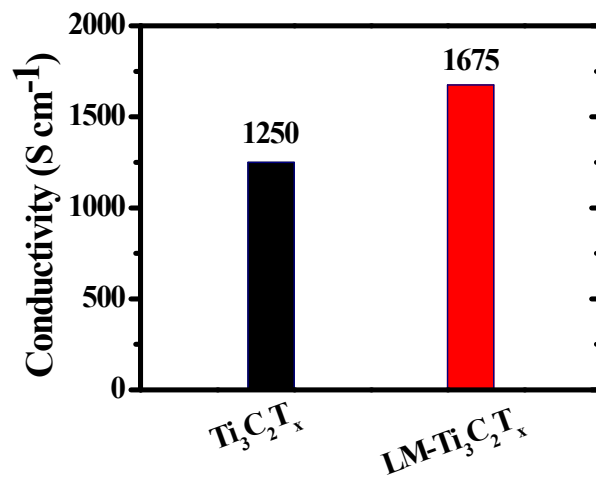

Figure S9 Conductivity of Ti<sub>3</sub>C<sub>2</sub>T<sub>x</sub> monolith and LM-Ti<sub>3</sub>C<sub>2</sub>T<sub>x</sub>

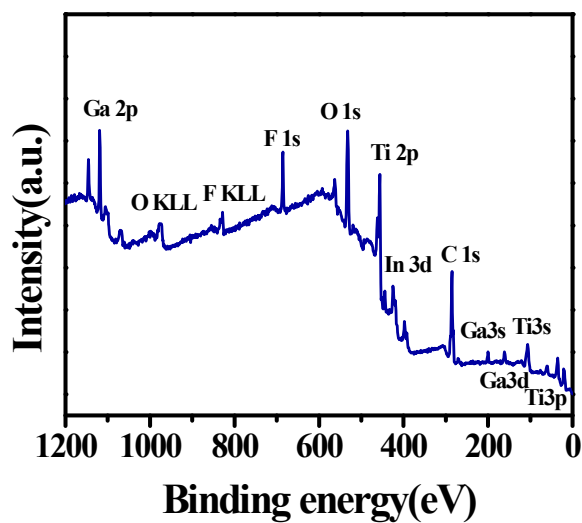

Figure S10 XPS full spectrum of LM-Ti<sub>3</sub>C<sub>2</sub>T<sub>x</sub>

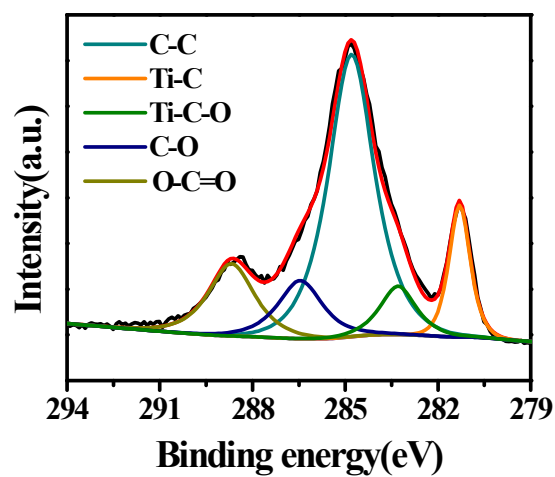

Figure S11 C 1s spectrum of LM-Ti<sub>3</sub>C<sub>2</sub>T<sub>x</sub>

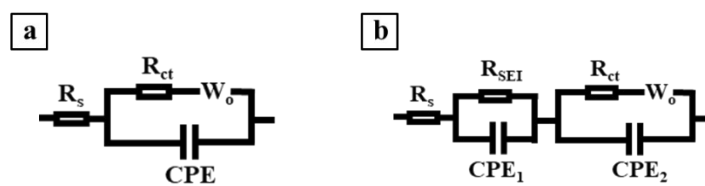

Figure S12 (a) Fitting the equivalent circuit diagram of LM-Ti<sub>3</sub>C<sub>2</sub>T<sub>x</sub> anode before and (b) after cycle

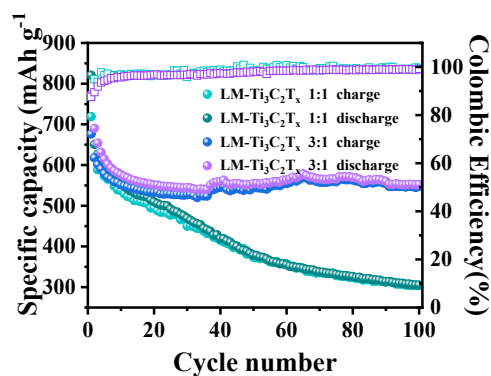

Figure S13 Cycling performance of LM-Ti<sub>3</sub>C<sub>2</sub>T<sub>x</sub> with different mass ratios at 0.1 A g<sup>-1</sup> current density.

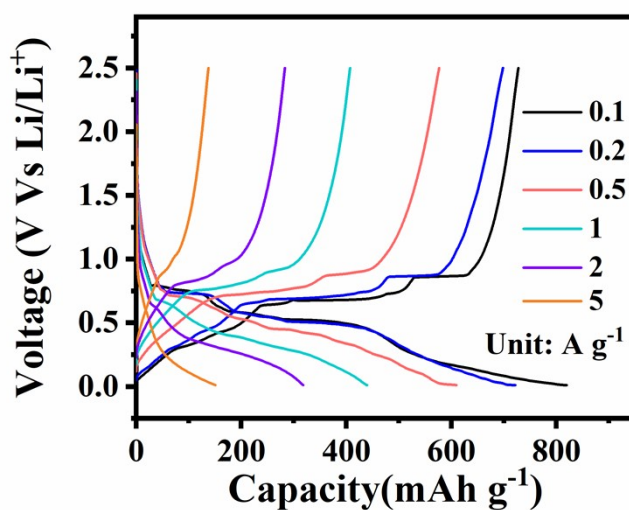

Figure S14 Galvanostatic charge/discharge curves of LMNPs, with an initial capacity of 819 mAh g<sup>-1</sup>

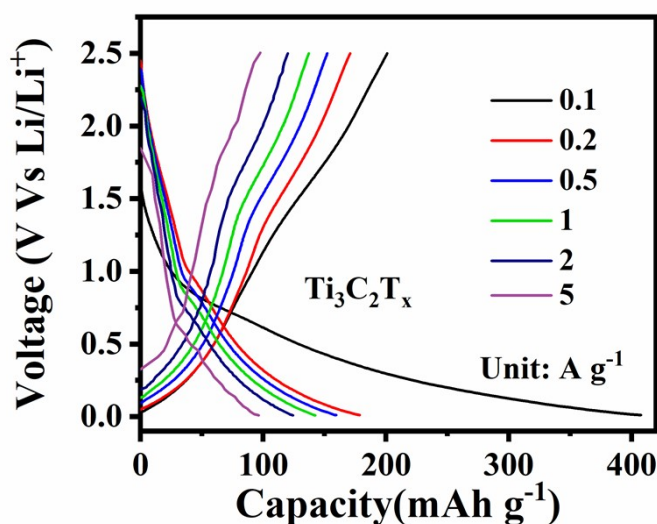

Figure S15 Galvanostatic charge/discharge curves of Ti<sub>3</sub>C<sub>2</sub>T<sub>x</sub> monolith, which show an initial capacity of 407 mAh g<sup>-1</sup>. Since the mass content of Ti<sub>3</sub>C<sub>2</sub>T<sub>x</sub> is 37.3 wt.%, the capacity contribution is calculated to be 151.8 mAh g<sup>-1</sup>. The calculation method is consistent with the relevant reports. [1]

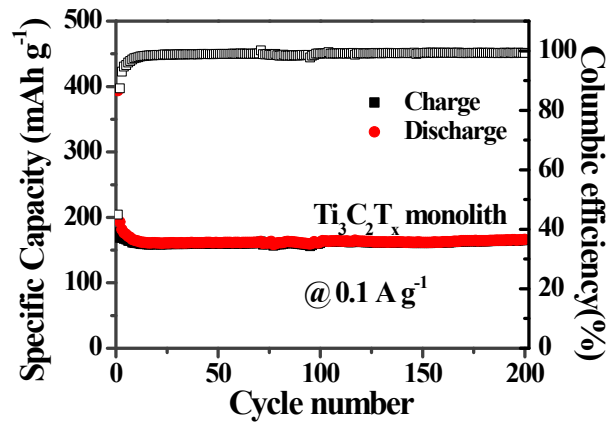

Figure S16 cycling performance of  $\text{Ti}_3\text{C}_2\text{T}_x$  monolith at  $0.1 \text{ A g}^{-1}$

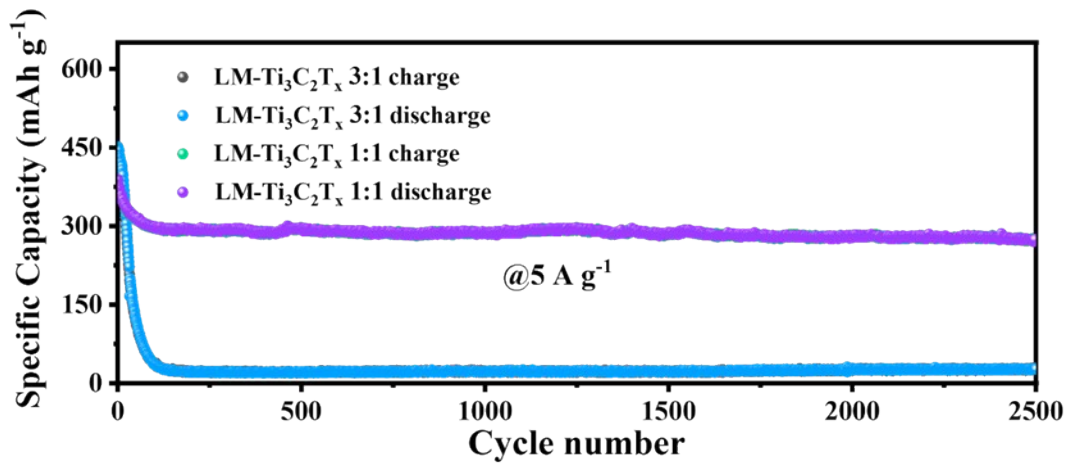

Figure S17 Cycling performance at  $5 \text{ A g}^{-1}$  of LM- $\text{Ti}_3\text{C}_2\text{T}_x$  with different mass ratio.

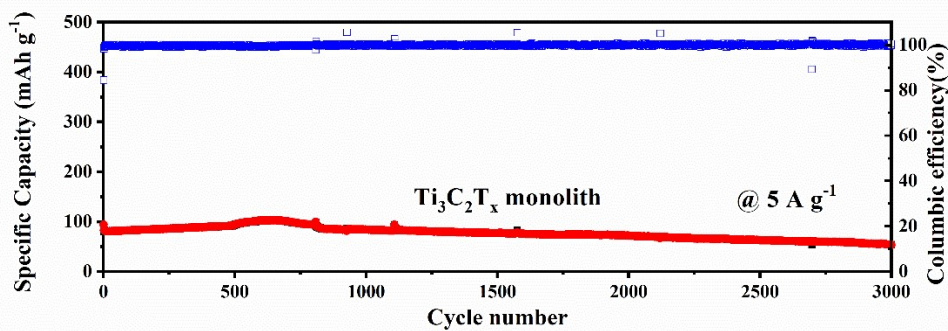

Figure S18 Cycling performance at  $5 \text{ A g}^{-1}$  of  $\text{Ti}_3\text{C}_2\text{T}_x$  monolith



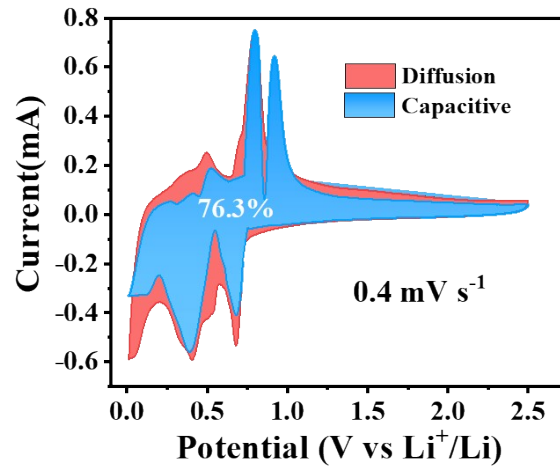

Figure S19 pseudocapacitor contribution at 0.4 mV s<sup>-1</sup> sweep rate

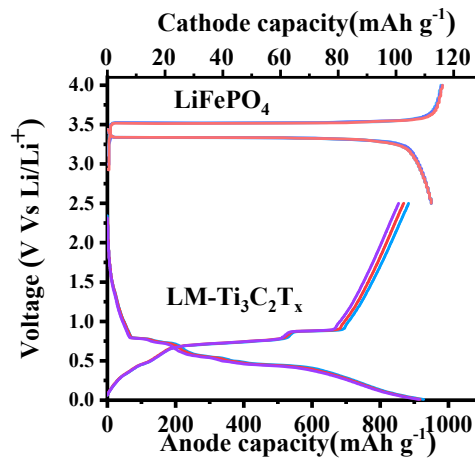

Figure S20 Galvanostatic charge/discharge curves of LM-Ti<sub>3</sub>C<sub>2</sub>T<sub>x</sub> anode and LiFePO<sub>4</sub> cathode

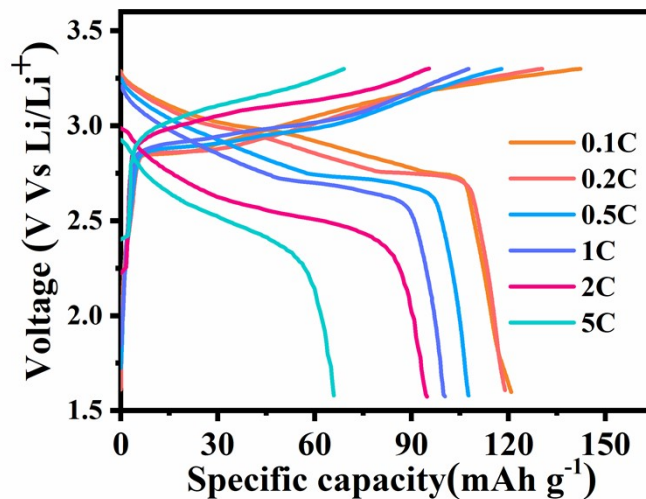

Figure S21 Galvanostatic charge/discharge curves of LiFePO<sub>4</sub>//LM-Ti<sub>3</sub>C<sub>2</sub>T<sub>x</sub> full cells at different current density (1C=170 mA g<sup>-1</sup>), demonstrating good rate performance in practical applications.

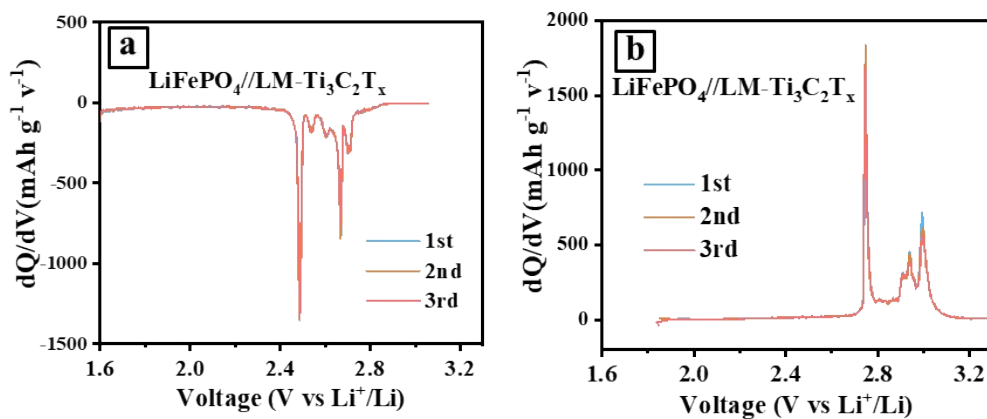

Figure S22 dQ/dv (a) discharge and (b) charge curves of LFP//LM-Ti<sub>3</sub>C<sub>2</sub>T<sub>x</sub> with high magnification

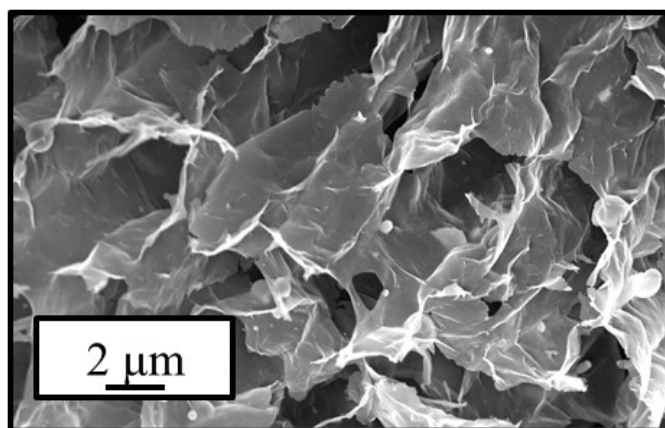

Figure S23 SEM image of LM-Ti<sub>3</sub>C<sub>2</sub>T<sub>x</sub> electrode with a 3D architecture

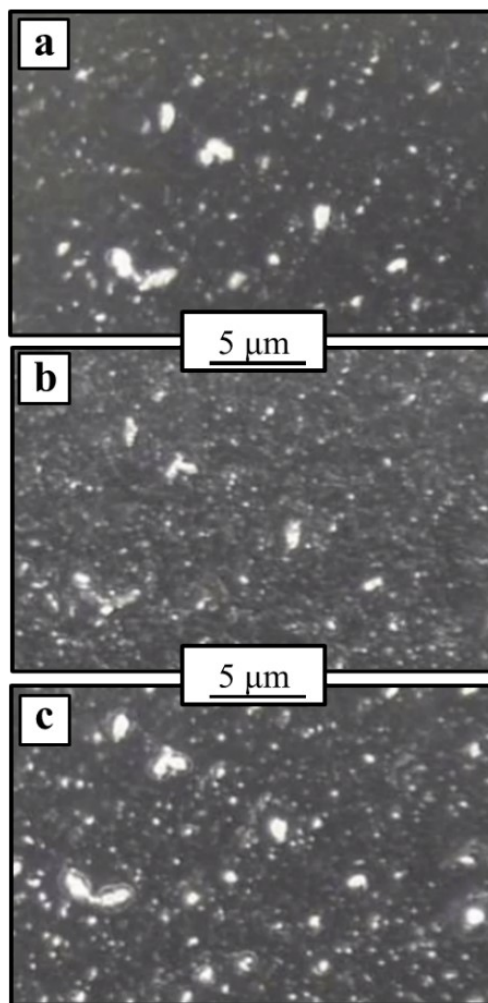

Figure S24 (a) In-situ optical images of LM-Ti<sub>3</sub>C<sub>2</sub>T<sub>x</sub> electrode before cycle, (b) fully alloying and (c) fully de-alloying.

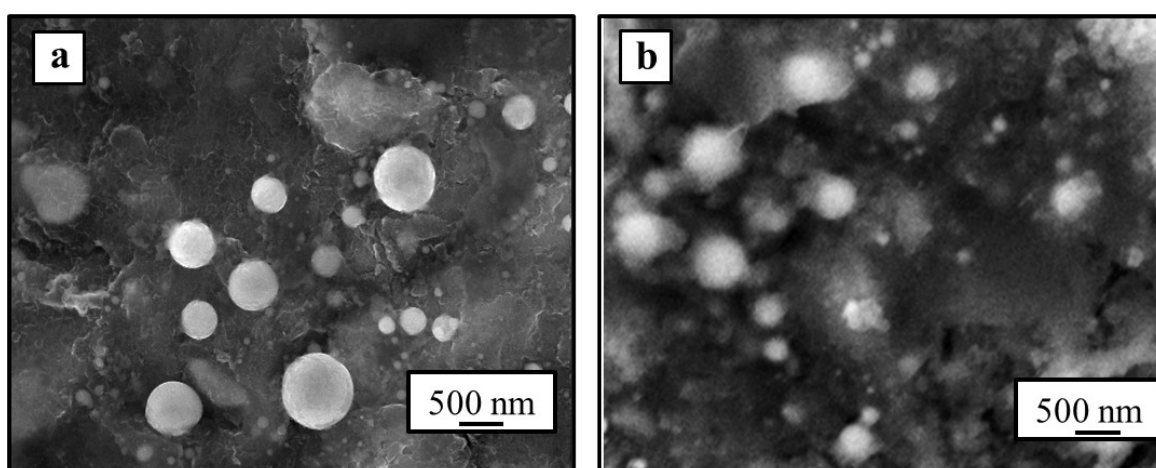

Figure S25 (a) SEM images of LM-Ti<sub>3</sub>C<sub>2</sub>T<sub>x</sub> anode before cycle and (b) SEM images of LM-Ti<sub>3</sub>C<sub>2</sub>T<sub>x</sub> anode after 4500 cycles, which showed a similar spherical morphology compared with initial state. The cyclic process was under 5 A g<sup>-1</sup> current density.

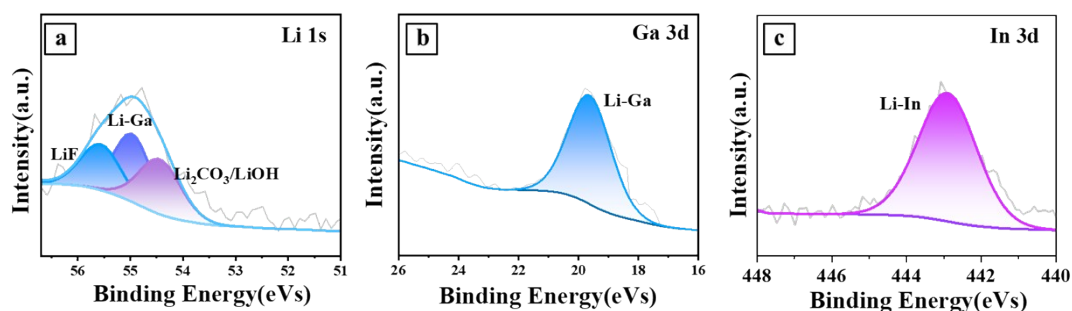

Figure S26 XPS Li 1s, Ga 3d and In 3d spectrum of LM- $\text{Ti}_3\text{C}_2\text{T}_x$  anode after lithiated

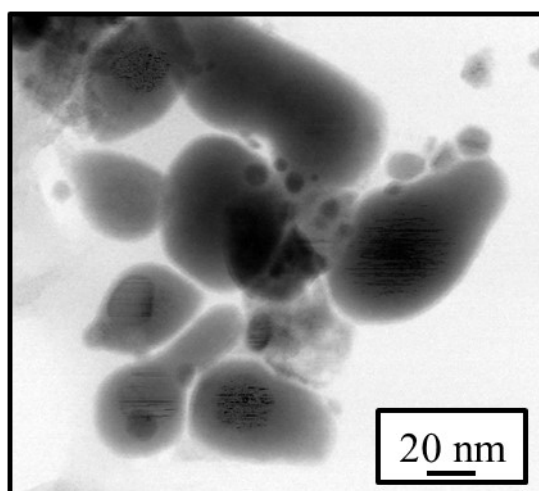

Figure S27 STEM image of the LMNPs after fully alloying, showing a phase separation of Ga and In.

Table S1 Comparison of Ga-based liquid metal performance for LIBs anode

| Anode | Capacity                                                                                                                    | Characteristic                              | Ref |
|-------|-----------------------------------------------------------------------------------------------------------------------------|---------------------------------------------|-----|
| Ga    | $\sim 400 \text{ mAh g}^{-1}$ at 0.2 C                                                                                      | Under $40^\circ\text{C}$ working conditions | [2] |
| Ga-In | $400 \text{ mAh g}^{-1}$ at 5 C; $\sim 400 \text{ mAh g}^{-1}$ at 3 C after 500 cycles                                      | Mixed with conductive addiction             | [3] |
| Ga-Sn | $493, 419 \text{ mAh g}^{-1}$ at 2, 3 A $\text{g}^{-1}$ ; $400 \text{ mAh g}^{-1}$ at 4 A $\text{g}^{-1}$ after 4000 cycles | 3D Graphene/CNTs as skeleton                | [4] |
| Ga-Sn | $603$ and $499 \text{ mAh g}^{-1}$ at 1 and 2 A/g; $552 \text{ mAh g}^{-1}$ at 1 A $\text{g}^{-1}$ after 1500 cycles        | Hollow MWCNTs nanofibers                    | [5] |

|                  |                                                                                                                                                                                                 |                                                                                                                        |      |
|------------------|-------------------------------------------------------------------------------------------------------------------------------------------------------------------------------------------------|------------------------------------------------------------------------------------------------------------------------|------|
| Ga-In-Sn-Zn      | 404 mAh g <sup>-1</sup> at 1 A g <sup>-1</sup> ; lower than 400 mAh g <sup>-1</sup> at 0.5 A g <sup>-1</sup> after 50 cycles                                                                    | Utilizing MXene papers as current collectors                                                                           | [6]  |
| Ga-In            | 402.7, and 379.6 mAh g <sup>-1</sup> at 2 and 3 A g <sup>-1</sup> ; 151 mAh g <sup>-1</sup> at 1 A g <sup>-1</sup> after 600 cycles                                                             | Ultrasonic sieving of gallium-indium alloy particle size                                                               | [7]  |
| Ga-In-Sn         | 350, 270, 246, 234 and 200 mAh g <sup>-1</sup> at 121, 242, 363 484 and 605 mA g <sup>-1</sup> ; 350.6 mAh g <sup>-1</sup> after 16 cycles at 60.5 mA g <sup>-1</sup>                           | a simple high-speed stirring method                                                                                    | [8]  |
| Ga-In            | 773, 675, 607, 462, and 350 mAh g <sup>-1</sup> at 0.1, 0.2, 0.5, 1.0 and 2.0 A g <sup>-1</sup> ; 499.8 mAh g <sup>-1</sup> after 500 cycles at 1.0 A g <sup>-1</sup>                           | A tightly PPy wrapped EGaSn structure is formed during the in-situ polymerization synthesis process                    | [9]  |
| Ga-In            | 542.8, 479.7, 434.0, 414.1, 387.1, and 380.4 mAh g <sup>-1</sup> at 0.1, 0.2, 0.5, 1, 2, and 3 A g <sup>-1</sup> ; lower than 200 mAh g <sup>-1</sup> after 800 cycles at 1.0 A g <sup>-1</sup> | LMNPs with modified interface                                                                                          | [10] |
| Ga-In            | 716, 580, 475, 415, and 351 mAh g <sup>-1</sup> at 80, 160, 400, 800 and 1.6 A g <sup>-1</sup> ; 397.4 mAh g <sup>-1</sup> at 1 A g <sup>-1</sup> after 150 cycles                              | a simple one-step suction filter method was adopted to load EGaIn NPs on the self-supported CNF/CNT conductive network | [11] |
| Ga-In            | 886.5, 647.3, 552.1, and 427.5 mA h g <sup>-1</sup> at 0.1, 0.5, 1, and 2 A g <sup>-1</sup> ; 300 mAh g <sup>-1</sup> at 4 A g <sup>-1</sup> after 700 cycles                                   | EGaIn NPs@PVP core-shell structure                                                                                     | [12] |
| <b>This work</b> | <b>489 mAh g<sup>-1</sup> at 5 A g<sup>-1</sup>; 409.8 mAh g<sup>-1</sup> at 5 A g<sup>-1</sup> after 4500 cycles</b>                                                                           | In-situ encapsulation of LM by Ti <sub>3</sub> C <sub>2</sub> T <sub>x</sub> -MXene, enable the self-healing ability   |      |

The composition of the LM after full lithiation is relatively simple, only consisting of Li<sub>2</sub>Ga and Li<sub>2</sub>In. Therefore, the calculation process of the composition contents is based on the following equations (take Li as the example), while the mass of Gallium-indium alloy is normalized.

$$n(\text{Li}) = 2 \times \left( \frac{m(\text{Ga})}{M(\text{Ga})} + \frac{m(\text{In})}{M(\text{In})} \right) = 2 \times \left( \frac{0.75 \text{ g}}{69 \text{ g/mol}} + \frac{0.25 \text{ g}}{114 \text{ g/mol}} \right) = 0.0262 \text{ mol}$$

$$m(\text{Li}) = n(\text{Li}) \times M(\text{Li}) = 0.183 \text{ g}$$

$$\omega(\text{Li}) = \frac{m(\text{Li})}{m(\text{Li}) + m(\text{Ga}) + m(\text{In})} = 15.47\text{wt}\%$$

Table S2 Composition of Li-Ga-In contents

| Elements | Before lithiation contents (wt %) | After lithiation contents (wt %) |
|----------|-----------------------------------|----------------------------------|
| Li       | 0                                 | 15.84                            |
| Ga       | 75                                | 63.55                            |
| In       | 25                                | 20.61                            |

## References

- [1] Z.Y. Zhao, J.W. Han, F.Q. Chen, J. Xiao, Y.F. Zhao, Y.F. Zhang, D.B. Kong, Z. Weng, S.C. Wu and Q.H. Yang, *Adv. Energy. Mater.*, **2022**, 12, 2103565.
- [2] R. D. Deshpande, J. Li, Y.-T. Cheng and M. W. Verbrugge, *J. Electrochem. Soc.*, **2011**, 158, A845-A849.
- [3] X. Guo, Y. Ding, L. Xue, L. Zhang, C. Zhang, J. B. Goodenough and G. Yu, *Adv. Funct. Mater.* **2018**, 28, 1804649.
- [4] Y. Wu, L. Huang, X. Huang, X. Guo, D. Liu, D. Zheng, X. Zhang, R. Ren, D. Qu and J. Chen, *Energy Environ. Sci.* **2017**, 10, 1854-1861.
- [5] J. Zhu, Y. Wu, X. Huang, L. Huang, M. Cao, G. Song, X. Guo, X. Sui, R. Ren and J. Chen, *Nano Energy.* **2019**, 62, 883-889.
- [6] C. Wei, H. Fei, Y. Tian, Y. An, G. Zeng, J. Feng and Y. Qian, *Small.* **2019**, 15, e1903214.
- [7] C.H. Huang, J.J. Zong, X.D. Wang, Q.P. Cao, D.X. Zhang and J.Z. Jiang, *Materials*, **2021**, 14, 1759.
- [8] Y. Qi, C. Shen, Q. Hou, Z. Ren, T. Jin and K. Xie, *J. Energy. Chem.*, **2022**, 72, 522-531.
- [9] Y. Huang, H. Wang, Y. Jiang and X. Jiang, *Mater. Lett.*, **2020**, 276, 128261.
- [10] C. Huang, X. Wang, Q. Cao, D. Zhang and J.-Z. Jiang, *ACS Appl. Energy. Mater.*, **2021**, 4, 12224-12231.
- [11] J. Yu, J. Xia, X. Guan, G. Xiong, H. Zhou, S. Yin, L. Chen, Y. Yang, S. Zhang, Y. Xing and P. Yang, *Electrochimica Acta*, **2022**, 425, 140721.
- [12] Y. Liu, Q. Wang, S. Bi, W. Zhang, H. Zhou and X. Jiang, *Nanoscale*, **2020**, 12, 13731-13741.
